# Supplementary material for: High resolution LGM climate over Europe and the Alpine region using the regional climate model WRF
Source: Copernicus journal article supplement (doi:10.5194/egusphere-2023-1197), 2023-06-27
Supplement: Supplementary file 1 [file egusphere-2023-1197-supplement.pdf]

# Supplements for : High resolution LGM climate over Europe and the Alpine region using the regional climate model WRF

Emmanuele Russo<sup>1,2,3</sup>, Jonathan Buzan<sup>1,2</sup>, Sebastian Lienert<sup>1,2</sup>, Guillaume Jouvét<sup>4,5</sup>, Patricio Velasquez Alvarez<sup>1,2,3</sup>, Basil Davis<sup>5</sup>, Patrick Ludwig<sup>6</sup>, Fortunat Joos<sup>1,2</sup>, and Christoph C. Raible<sup>1,2</sup>

<sup>1</sup>Climate and Environmental Physics, University of Bern, Sidlerstrasse 5, 3012, Bern, Switzerland.

<sup>2</sup>Oeschger Centre for Climate Change Research, University of Bern, Hochschulstrasse 4, 3012, Bern, Switzerland.

<sup>3</sup>now at: Institute for Atmospheric and Climate Science (IAC), ETH Zurich, Universitätsstrasse 16, 8092 Zurich, Switzerland.

<sup>4</sup>Department of Geography University of Zurich, Zurich, Switzerland

<sup>5</sup>Institute of Earth Surface Dynamics, Geopolis, University of Lausanne, Switzerland

<sup>6</sup>Institute of Meteorology and Climate Research, Karlsruhe Institute of Technology, Karlsruhe, Germany

**Correspondence:** emmanuele.russo@env.ethz.ch

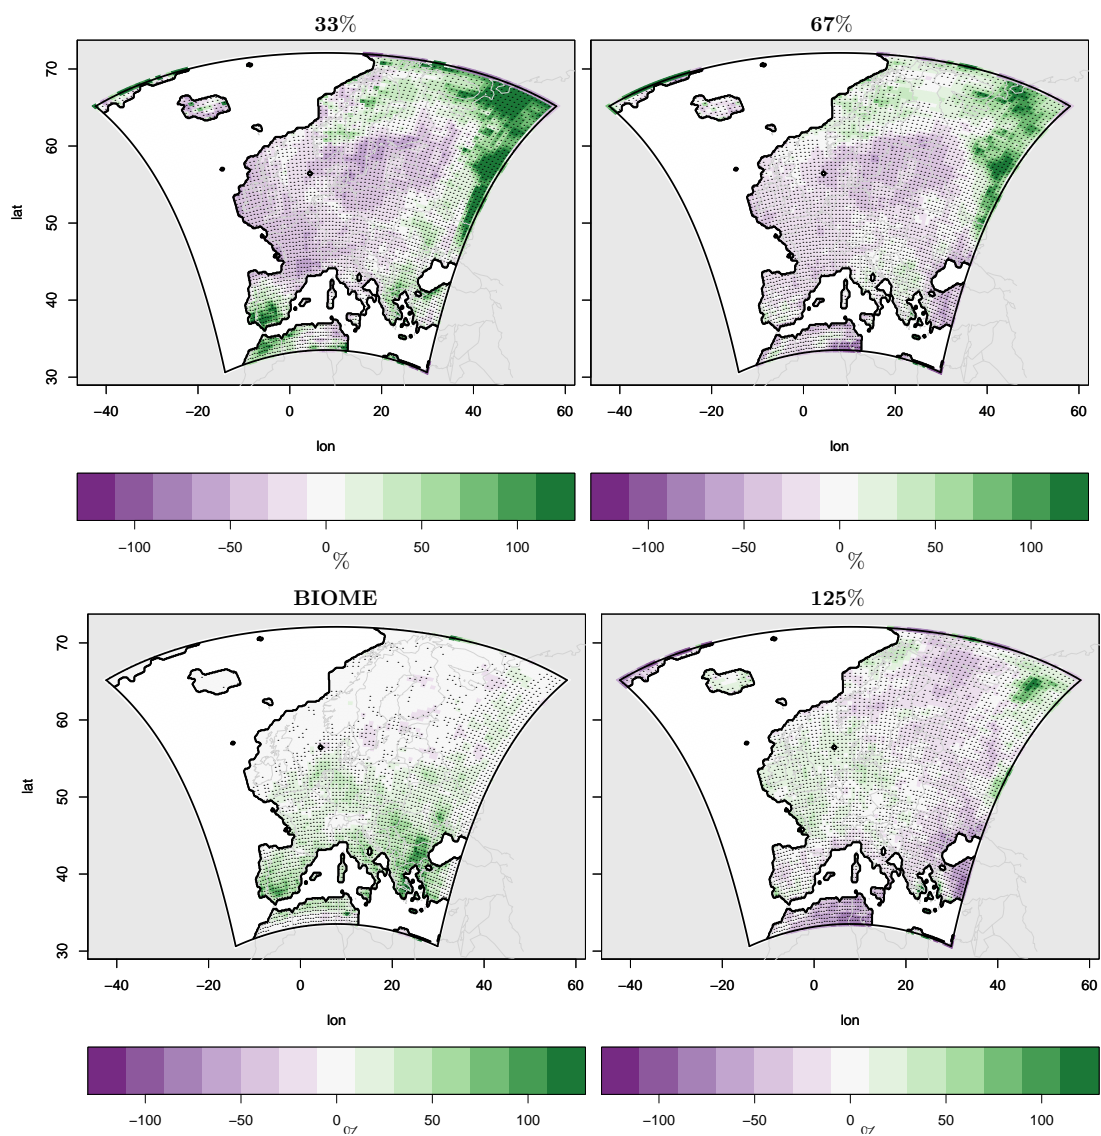

**Figure S1.** Bias in summer precipitation calculated for the coarser resolution domain d01, between the reference simulation and the other members of the ensemble. The dots in each of the figures represent the points for which the values differ significantly, at a significance level of 0.05, according to the results of a KS significance test.
